# Supplementary material for: A Molecular Survey on Neglected Gurltia paralysans and Aelurostrongylus abstrusus Infections in Domestic Cats (Felis catus) from Southern Chile
Source: MDPI journal article supplement (doi:10.3390/pathogens10091195), 2021-09-15
Supplement: s1 [file s1]

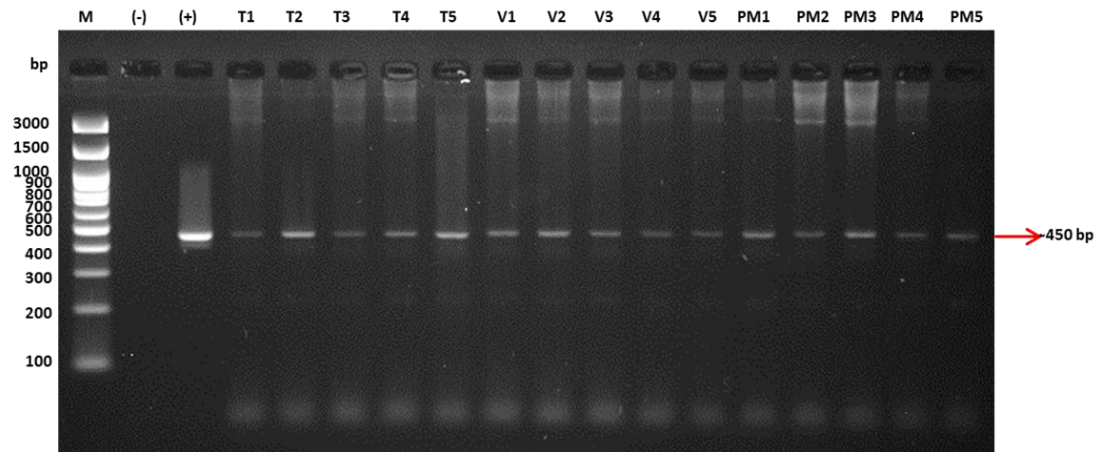

**Figure S1.** Amplification of common DNA sequence of the Metastrongyloidea superfamily, obtained in a PCR examination with blood DNA samples of domestic cats from the cities of Temuco, Valdivia and Puerto Montt, Southern Chile. M: Molecular Weight Marker. T1 → T5: Samples from the city of Temuco. V1 → V5: Samples from the city of Valdivia. PM1 → PM5: Samples from the city of Puerto Montt. (-): Negative control. (+): Positive control. bp: base pairs. Molecular target (red arrow): approximately 450 base pairs (bp).

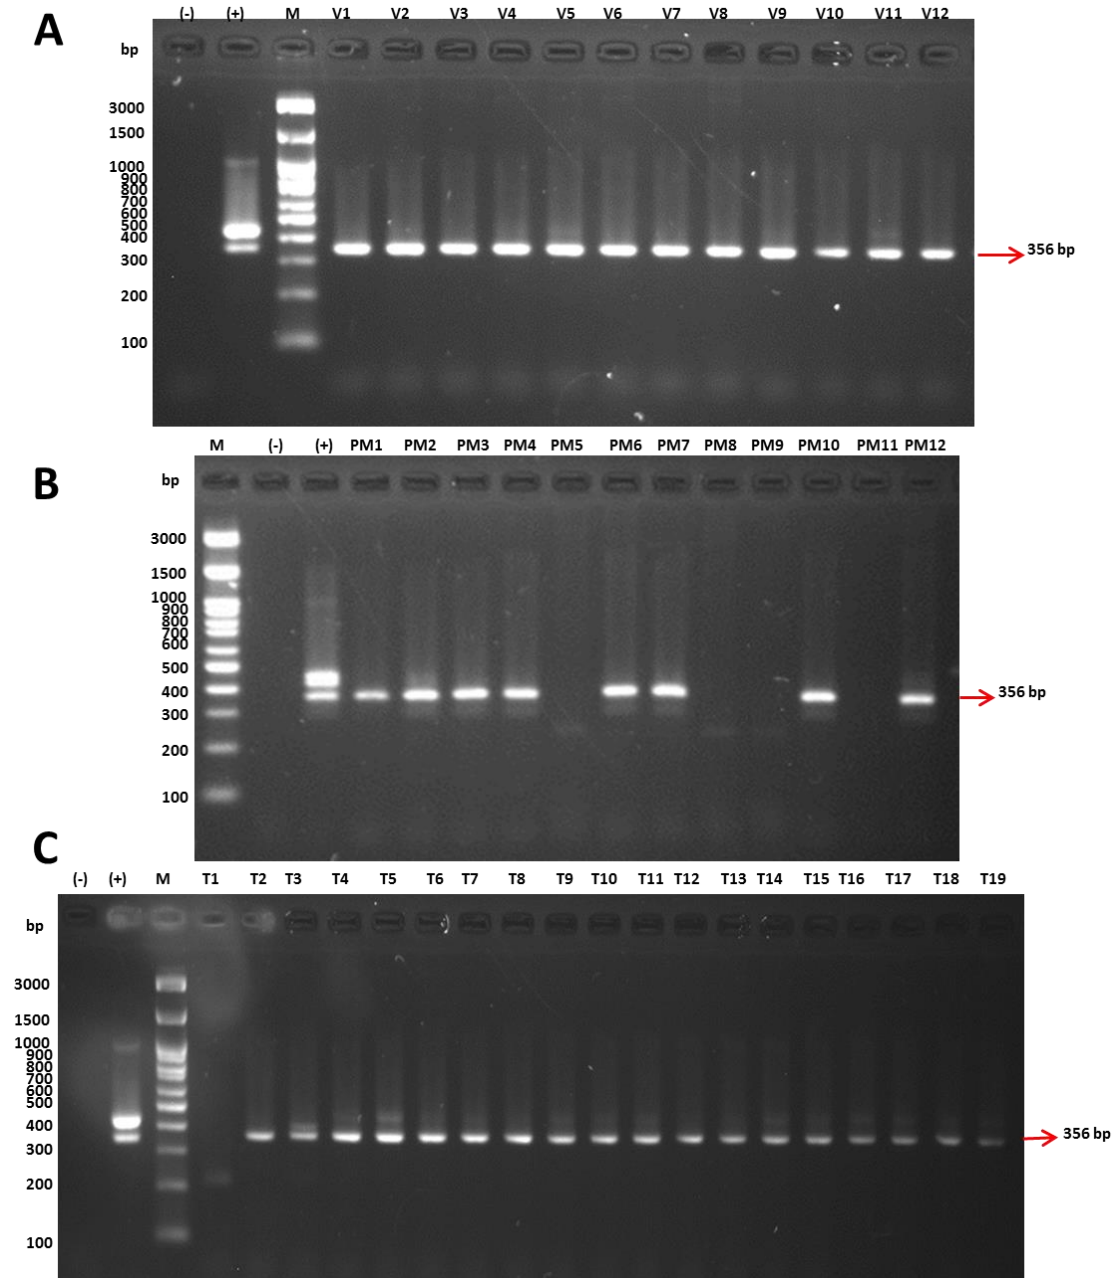

**Figure S2.** Molecular detection of *Gurltia paralyans* by semi-nested PCR in domestic feline blood DNA samples. M: Molecular Weight Marker. A: DNA samples of domestic cat blood from the City of Valdivia, Los Ríos Region, Chile (V1 → V12). B: DNA samples from domestic cat blood from the city of Puerto Montt, Los Lagos Region, Chile (PM1 → PM12). C: DNA samples from domestic cat blood from the city of Temuco, La Araucanía Region, Chile (T1 → 19). (-): Negative control. (+): Positive control. bp: base pairs. Molecular target (red arrow): 356 bp.

**Table S1.** Genetic sequence analysis of 7 samples for *Gurltia paralyans* and 2 samples for *Aelurostrongylus abstrusus* from domestic felines from southern Chile.

| Sample | Description                                                                                                                                                                                                                   | Max. Score | Total Score | Query Coverage | E-value              | % Identity | Accession  |
|--------|-------------------------------------------------------------------------------------------------------------------------------------------------------------------------------------------------------------------------------|------------|-------------|----------------|----------------------|------------|------------|
| PT37   | <i>Gurltia paralyans</i> 18S ribosomal RNA gene, partial sequence; internal transcribed spacer 1, 5.8S ribosomal RNA gene, and internal transcribed spacer 2 complete sequence; and 28S ribosomal RNA gene, partial sequence. | 459        | 459         | 100%           | $3 \times 10^{-125}$ | 100%       | JX975484.2 |
| PT46   | <i>Gurltia paralyans</i> 18S ribosomal RNA gene, partial sequence; internal transcribed spacer 1, 5.8S ribosomal RNA gene, and internal transcribed spacer 2 complete sequence; and 28S ribosomal RNA gene, partial sequence. | 460        | 460         | 100%           | $1 \times 10^{-125}$ | 100%       | JX975484.2 |
| PT52   | <i>Gurltia paralyans</i> 18S ribosomal RNA gene, partial sequence; internal transcribed spacer 1, 5.8S ribosomal RNA gene, and internal transcribed spacer 2 complete sequence; and 28S ribosomal RNA gene, partial sequence. | 640        | 640         | 99%            | $2 \times 10^{-179}$ | 100%       | JX975484.2 |
| T22    | <i>Gurltia paralyans</i> 18S ribosomal RNA gene, partial sequence; internal transcribed spacer 1, 5.8S ribosomal RNA gene, and internal                                                                                       | 558        | 558         | 100%           | $4 \times 10^{-155}$ | 99.7%      | JX975484.2 |

|       |                                                                                                                                                                                                                                                                 |     |     |      |                      |        |            |
|-------|-----------------------------------------------------------------------------------------------------------------------------------------------------------------------------------------------------------------------------------------------------------------|-----|-----|------|----------------------|--------|------------|
|       | transcribed spacer 2<br>complete sequence;<br>and 28S ribosomal<br>RNA gene, partial<br>sequence.                                                                                                                                                               |     |     |      |                      |        |            |
| T38   | <i>Gurltia paralysans</i> 18S<br>ribosomal RNA gene,<br>partial sequence;<br>internal transcribed<br>spacer 1, 5.8S<br>ribosomal RNA gene,<br>and internal<br>transcribed spacer 2<br>complete sequence;<br>and 28S ribosomal<br>RNA gene, partial<br>sequence. | 617 | 617 | 100% | $8 \times 10^{-173}$ | 100%   | JX975484.2 |
| T58   | <i>Gurltia paralysans</i> 18S<br>ribosomal RNA gene,<br>partial sequence;<br>internal transcribed<br>spacer 1, 5.8S<br>ribosomal RNA gene,<br>and internal<br>transcribed spacer 2<br>complete sequence;<br>and 28S ribosomal<br>RNA gene, partial<br>sequence. | 614 | 614 | 100% | $1 \times 10^{-171}$ | 100%   | JX975484.2 |
| PT59  | <i>Gurltia paralysans</i> 18S<br>ribosomal RNA gene,<br>partial sequence;<br>internal transcribed<br>spacer 1, 5.8S<br>ribosomal RNA gene,<br>and internal<br>transcribed spacer 2<br>complete sequence;<br>and 28S ribosomal<br>RNA gene, partial<br>sequence. | 623 | 623 | 100% | $2 \times 10^{-174}$ | 100%   | JX975484.2 |
| T22_A | <i>Aelurostrongylus<br/>abstrusus</i> 28S rRNA<br>gene                                                                                                                                                                                                          | 263 | 263 | 100% | $2 \times 10^{-66}$  | 89.40% | AM039759.1 |

---

|       |                                                              |     |     |      |                     |        |            |
|-------|--------------------------------------------------------------|-----|-----|------|---------------------|--------|------------|
| T38_A | <i>Aelurostrongylus</i><br><i>abstrusus</i> 28S rRNA<br>gene | 316 | 316 | 100% | $2 \times 10^{-82}$ | 90.36% | AM039759.1 |
|-------|--------------------------------------------------------------|-----|-----|------|---------------------|--------|------------|

---
